# Supplementary material for: Desorption of hydrogen from light metal hydrides: concerted electronic rearrangement and role of H⋯H interactions
Source: Royal Society of Chemistry journal article supplement (doi:10.1039/c4cc00987h), 2014-01-01
Supplement: c4cc00987h1.pdf [file c4cc00987h1.pdf]

**Supplementary Information**

**for the manuscript**

**“Desorption of hydrogen from light metal hydrides:  
concerted electronic rearrangement and role of H···H  
interactions”**

David J. Wolstenholme,\* Matthew M.D. Roy, Michael E. Thomas and G. Sean McGrady\*

Department of Chemistry  
University of New Brunswick  
P.O. Box 4400  
Fredericton, N.B., Canada  
E3B 5A3

**Computational Details.** The geometry optimisations of the benchmark metal hydrides were each performed at the CCSD/6-311++G(d,p) level of approximation using the Gaussian09 software suite [1]. These calculations entailed constraining the H $\cdots$ H distances for both conformations, while the head-to-tail dimers that exhibited complete M-H bond cleavage required an additional M-H $\cdots$ H-M dihedral angle constraint to maintain a linear configuration. The subsequent topological analyses of the electron distributions and atomic properties were then carried out using the AIMALL software package [2].

[1] M.J. Frisch et al. Gaussian09, Revision A.02, Gaussian Inc., Wallingford, CT (USA), 2009

[2] T.A. Keith, *AIMALL*, version 13.05.06, TK Gristmill Software, 2013

**Table S1.** Decomposition temperature ( $T_{des}$ ), Pauling electronegativity ( $\chi$ ), and standard redox potential ( $E^\circ$ ) values for selected metal hydrides.

| Compound         | $T_{des}$ (°C) | $\chi$ (M) | $E^\circ$ (V) |
|------------------|----------------|------------|---------------|
| LiH              | 720            | 0.98       | -3.04         |
| NaH              | 425            | 0.93       | -2.713        |
| KH               | 417            | 0.82       | -2.925        |
| RbH              | 170            | 0.82       | -2.924        |
| CsH              | 170            | 0.79       | -2.923        |
| BeH <sub>2</sub> | 250            | 1.57       | -1.97         |
| MgH <sub>2</sub> | 327            | 1.31       | -2.356        |
| CaH <sub>2</sub> | 600            | 1.00       | -2.84         |
| SrH <sub>2</sub> | 675            | 0.95       | -2.89         |
| BaH <sub>2</sub> | 675            | 0.89       | -2.92         |

[1] W. Grochala, P.P. Edwards, *Chem. Rev.*, 2004, **104**, 1283

[2] L. Pauling, “*The Nature of the Chemical Bond*”; 3<sup>rd</sup>, Cornell University Press: Ithaca, New York, 1960

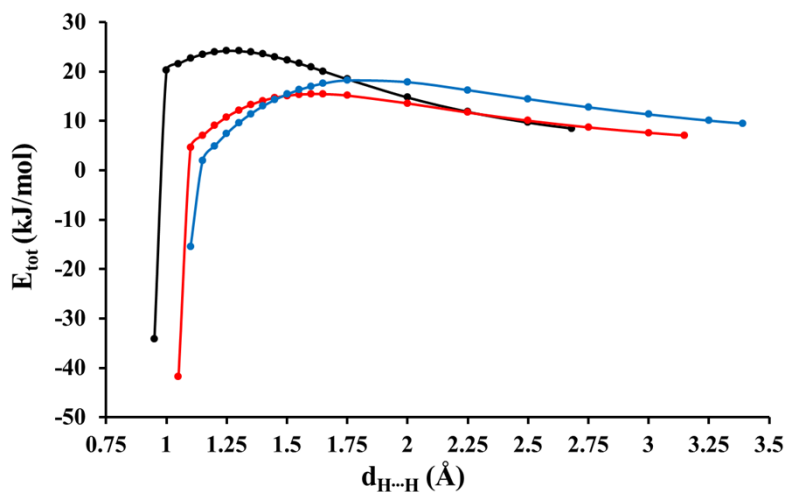

**Figure S1.** Internal energy profiles for the head-to-tail dimers of LiH (black), NaH (red), and KH (blue) vs. H $\cdots$ H distance.

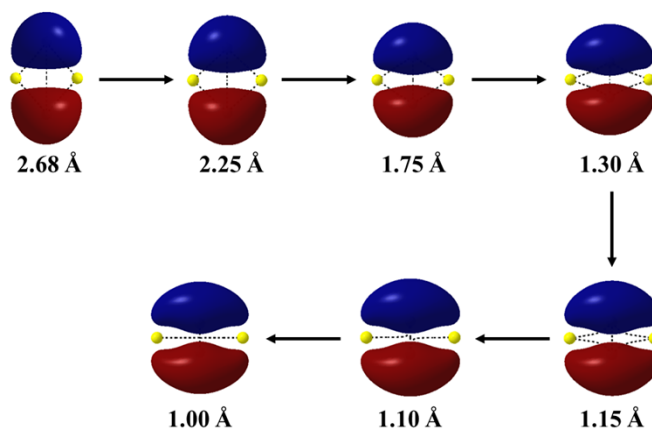

**Figure S2.** Plot of the highest occupied molecular orbital (HOMO) for **1** at a range of H···H separations. Isoelectronic density levels are  $0.337 \text{ e}\text{\AA}^{-3}$ .

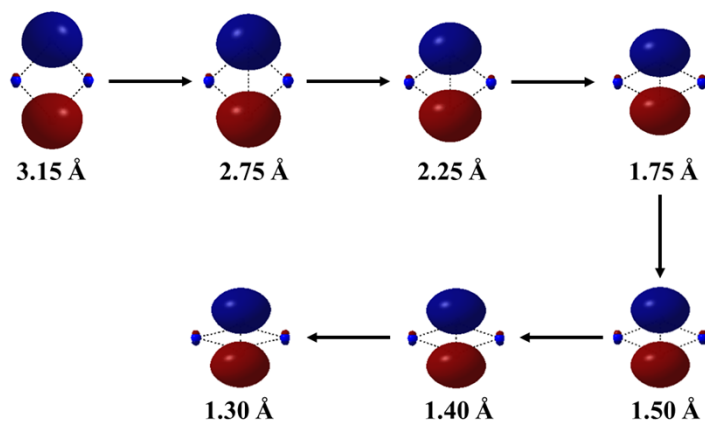

**Figure S3.** Plot of the highest occupied molecular orbital (HOMO) for **2** at a range of H···H separations. Isoelectronic density levels are  $0.337 \text{ e}\text{\AA}^{-3}$ .

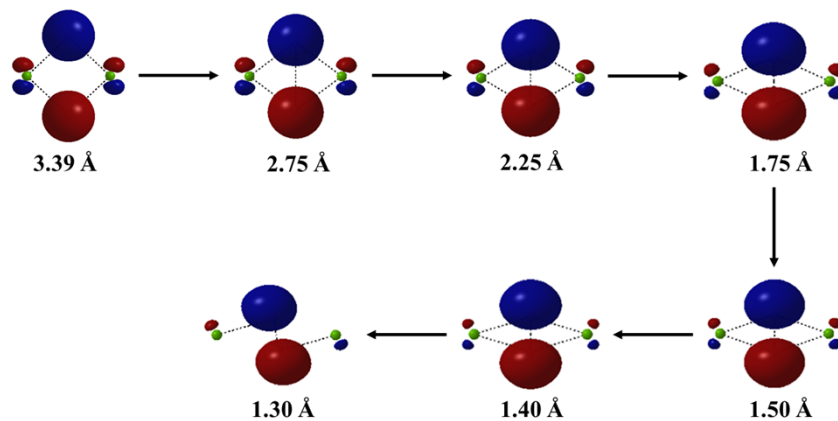

**Figure S4.** Plot of highest occupied molecular orbital (HOMO) for **3** at a range of H $\cdots$ H separations. Isoelectronic density levels are  $0.337 \text{ e}\text{\AA}^{-3}$ .

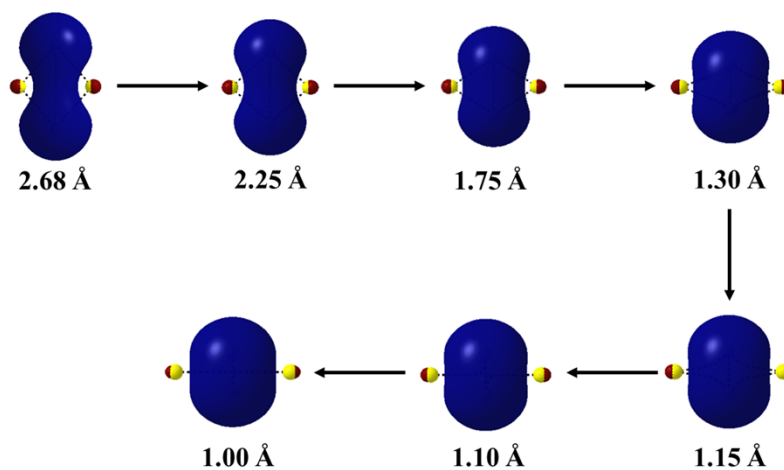

**Figure S5.** Plot of HOMO-1 for **1** at a range of H $\cdots$ H separations. Isoelectronic density levels are  $0.337 \text{ e}\text{\AA}^{-3}$ .

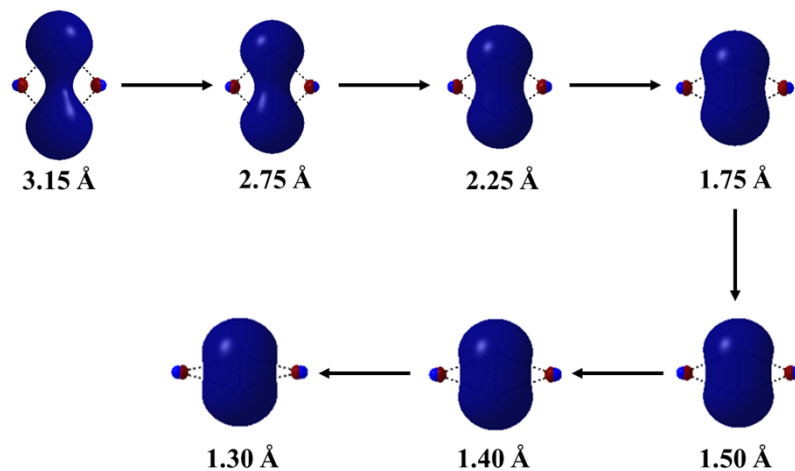

**Figure S6.** Plot of HOMO-1 for **2** at a range of H···H separations. Isoelectronic density levels are  $0.337 \text{ e}\text{\AA}^{-3}$ .

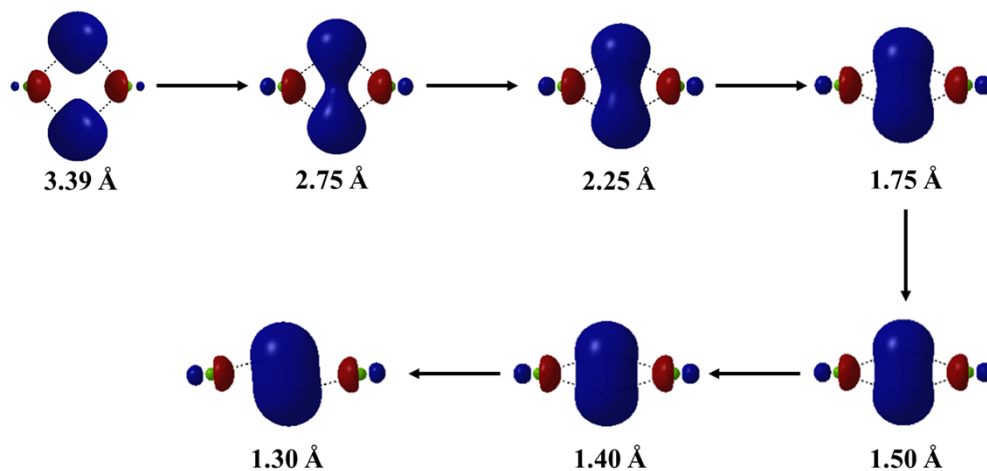

**Figure S7.** Plot of HOMO-1 for **3** at a range of H···H separations. Isoelectronic density levels are  $0.337 \text{ e}\text{\AA}^{-3}$ .

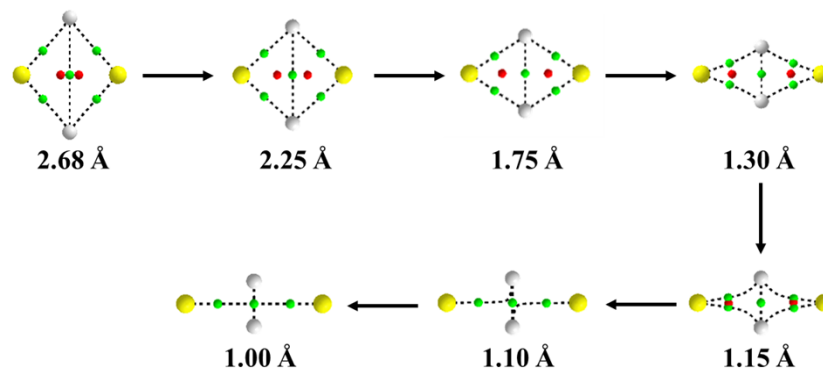

**Figure S8.** Molecular graphs for **1** at a range of H...H separations, with bond (BCP) and ring (RCP) critical points denoted as green and red spheres, respectively.

**Table S2.** Salient topological and atomic properties of the electron density for the M-H and H...H bonds in the rhombic and head-to-tail dimers of **1** at the CCSD/6-311++G(d,p) level of approximation.

| H...H              |                                 |                                         | M-H    |                                 |                                         | q(M)<br>au | q(H)<br>au | V(M)<br>au | V(H)<br>au |
|--------------------|---------------------------------|-----------------------------------------|--------|---------------------------------|-----------------------------------------|------------|------------|------------|------------|
| d<br>Å             | $\rho_b(r)$<br>eÅ <sup>-3</sup> | $\nabla^2\rho_b(r)$<br>eÅ <sup>-5</sup> | d<br>Å | $\rho_b(r)$<br>eÅ <sup>-3</sup> | $\nabla^2\rho_b(r)$<br>eÅ <sup>-5</sup> |            |            |            |            |
| <b>1</b>           |                                 |                                         |        |                                 |                                         |            |            |            |            |
| 3.50               | 0.072                           | 0.205                                   | 2.08   | 0.121                           | 1.269                                   | 0.90       | -0.90      | 27         | 134        |
| 3.25               | 0.081                           | 0.262                                   | 1.97   | 0.140                           | 1.647                                   | 0.90       | -0.90      | 26         | 128        |
| 3.00               | 0.093                           | 0.319                                   | 1.87   | 0.161                           | 2.115                                   | 0.90       | -0.90      | 26         | 123        |
| 2.75               | 0.110                           | 0.381                                   | 1.78   | 0.182                           | 2.665                                   | 0.90       | -0.90      | 25         | 119        |
| 2.68               | 0.115                           | 0.401                                   | 1.76   | 0.188                           | 2.822                                   | 0.90       | -0.90      | 25         | 118        |
| 2.50               | 0.133                           | 0.471                                   | 1.70   | 0.204                           | 3.252                                   | 0.90       | -0.90      | 24         | 115        |
| 2.25               | 0.165                           | 0.637                                   | 1.64   | 0.222                           | 3.800                                   | 0.90       | -0.90      | 24         | 112        |
| 2.00               | 0.210                           | 0.938                                   | 1.60   | 0.234                           | 4.222                                   | 0.90       | -0.90      | 24         | 110        |
| 1.75               | 0.279                           | 1.357                                   | 1.58   | 0.240                           | 4.511                                   | 0.89       | -0.89      | 25         | 109        |
| 1.65               | 0.318                           | 1.488                                   | 1.57   | 0.241                           | 4.592                                   | 0.89       | -0.89      | 25         | 109        |
| 1.60               | 0.341                           | 1.518                                   | 1.57   | 0.241                           | 4.619                                   | 0.89       | -0.89      | 25         | 109        |
| 1.55               | 0.366                           | 1.508                                   | 1.57   | 0.240                           | 4.644                                   | 0.89       | -0.89      | 25         | 110        |
| 1.50               | 0.395                           | 1.444                                   | 1.57   | 0.240                           | 4.689                                   | 0.89       | -0.89      | 25         | 110        |
| 1.45               | 0.428                           | 1.310                                   | 1.57   | 0.240                           | 4.743                                   | 0.89       | -0.89      | 26         | 110        |
| 1.40               | 0.465                           | 1.085                                   | 1.57   | 0.238                           | 4.772                                   | 0.88       | -0.88      | 26         | 110        |
| 1.35               | 0.507                           | 0.747                                   | 1.57   | 0.236                           | 4.811                                   | 0.88       | -0.88      | 26         | 111        |
| 1.30               | 0.553                           | 0.276                                   | 1.58   | 0.235                           | 4.857                                   | 0.88       | -0.88      | 27         | 111        |
| 1.25               | 0.606                           | -0.349                                  | 1.58   | 0.233                           | 4.933                                   | 0.88       | -0.88      | 27         | 112        |
| 1.20               | 0.666                           | -1.150                                  | 1.58   | 0.232                           | 5.021                                   | 0.87       | -0.87      | 28         | 113        |
| 1.15               | 0.733                           | -2.145                                  | 1.59   | 0.230                           | 5.127                                   | 0.87       | -0.87      | 29         | 114        |
| 1.10               | 0.808                           | -3.343                                  | 1.59   | 0.229                           | 5.236                                   | 0.86       | -0.86      | 29         | 115        |
| 1.05               | 0.893                           | -4.761                                  | 1.60   | 0.227                           | 5.282                                   | 0.86       | -0.86      | 30         | 115        |
| 1.00               | 0.989                           | -6.414                                  | 1.61   | 0.223                           | 5.297                                   | 0.85       | -0.85      | 31         | 116        |
| <b>Li-H...H-Li</b> |                                 |                                         |        |                                 |                                         |            |            |            |            |
| 3.50               | 0.010                           | 0.078                                   | 1.60   | 0.260                           | 3.990                                   | 0.89       | -0.89      | 26         | 130        |
| 3.25               | 0.015                           | 0.116                                   | 1.60   | 0.260                           | 3.975                                   | 0.89       | -0.89      | 26         | 131        |
| 3.00               | 0.021                           | 0.171                                   | 1.60   | 0.259                           | 3.961                                   | 0.89       | -0.89      | 26         | 132        |

|      |       |         |      |       |       |      |       |     |     |
|------|-------|---------|------|-------|-------|------|-------|-----|-----|
| 2.75 | 0.031 | 0.244   | 1.61 | 0.258 | 3.941 | 0.89 | -0.89 | 26  | 133 |
| 2.68 | 0.035 | 0.269   | 1.61 | 0.258 | 3.933 | 0.89 | -0.89 | 26  | 133 |
| 2.50 | 0.046 | 0.343   | 1.61 | 0.256 | 3.908 | 0.88 | -0.88 | 27  | 133 |
| 2.25 | 0.069 | 0.488   | 1.62 | 0.253 | 3.850 | 0.87 | -0.87 | 27  | 131 |
| 2.00 | 0.104 | 0.720   | 1.63 | 0.247 | 3.743 | 0.86 | -0.86 | 28  | 129 |
| 1.75 | 0.164 | 1.047   | 1.65 | 0.235 | 3.532 | 0.83 | -0.83 | 30  | 126 |
| 1.65 | 0.200 | 1.149   | 1.66 | 0.228 | 3.400 | 0.82 | -0.82 | 31  | 125 |
| 1.60 | 0.221 | 1.169   | 1.67 | 0.224 | 3.320 | 0.81 | -0.81 | 32  | 124 |
| 1.55 | 0.246 | 1.155   | 1.68 | 0.219 | 3.228 | 0.79 | -0.79 | 32  | 123 |
| 1.50 | 0.275 | 1.090   | 1.69 | 0.213 | 3.125 | 0.78 | -0.78 | 32  | 122 |
| 1.45 | 0.307 | 0.957   | 1.70 | 0.207 | 3.007 | 0.76 | -0.76 | 35  | 120 |
| 1.40 | 0.345 | 0.734   | 1.72 | 0.200 | 2.874 | 0.74 | -0.74 | 36  | 119 |
| 1.35 | 0.388 | 0.397   | 1.73 | 0.192 | 2.723 | 0.71 | -0.71 | 37  | 117 |
| 1.30 | 0.437 | -0.082  | 1.75 | 0.183 | 2.553 | 0.68 | -0.68 | 40  | 115 |
| 1.25 | 0.493 | -0.731  | 1.78 | 0.173 | 2.362 | 0.65 | -0.65 | 44  | 113 |
| 1.20 | 0.557 | -1.582  | 1.80 | 0.161 | 2.147 | 0.62 | -0.62 | 48  | 110 |
| 1.15 | 0.630 | -2.668  | 1.84 | 0.148 | 1.903 | 0.57 | -0.57 | 53  | 108 |
| 1.10 | 0.715 | -4.029  | 1.89 | 0.133 | 1.625 | 0.52 | -0.52 | 62  | 104 |
| 1.05 | 0.813 | -5.720  | 1.95 | 0.113 | 1.301 | 0.46 | -0.46 | 76  | 101 |
| 1.00 | 0.931 | -7.866  | 2.06 | 0.088 | 0.894 | 0.36 | -0.36 | 94  | 93  |
| 0.95 | 1.120 | -11.874 | 6.35 | 0.000 | 0.000 | 0.00 | 0.00  | 143 | 49  |

The optimised structures of the rhombic dimers **1** are presented in *italics*. The topological values of the electron density for RCPs are presented in red.

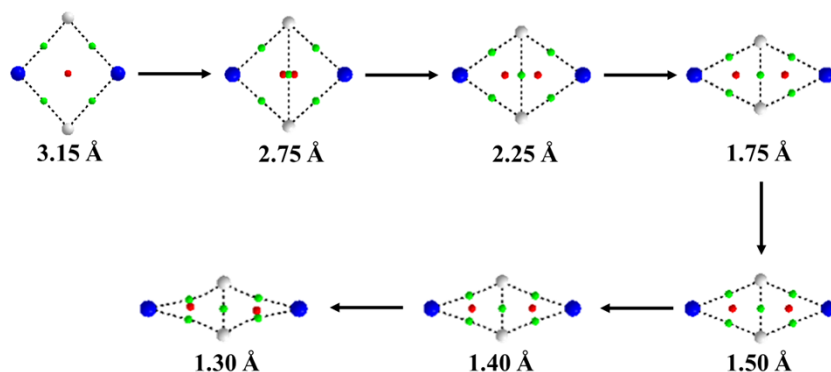

**Figure S9.** Plot of molecular graphs for **2** at a range of H...H separations, with bond (BCP) and ring (RCP) critical points denoted as green and red spheres, respectively.

**Table S3.** Salient topological and atomic properties of the electron density for the M-H and H...H bonds in the rhombic and head-to-tail dimers of **2** at the CCSD/6-311++G(d,p) level of approximation.

| d<br>Å | H...H                           |                                         | M-H    |                                 |                                         | q(M)<br>au | q(H)<br>au | V(M)<br>au | V(H)<br>au |
|--------|---------------------------------|-----------------------------------------|--------|---------------------------------|-----------------------------------------|------------|------------|------------|------------|
|        | $\rho_b(r)$<br>$e\text{Å}^{-3}$ | $\nabla^2\rho_b(r)$<br>$e\text{Å}^{-5}$ | D<br>Å | $\rho_b(r)$<br>$e\text{Å}^{-3}$ | $\nabla^2\rho_b(r)$<br>$e\text{Å}^{-5}$ |            |            |            |            |
| 2      |                                 |                                         |        |                                 |                                         |            |            |            |            |
| 3.50   | 0.050                           | 0.414                                   | 2.23   | 0.120                           | 1.543                                   | 0.85       | -0.85      | 63         | 128        |
| 3.25   | 0.056                           | 0.400                                   | 2.15   | 0.135                           | 1.876                                   | 0.85       | -0.85      | 62         | 125        |
| 3.15   | 0.059                           | 0.397                                   | 2.12   | 0.140                           | 2.009                                   | 0.85       | -0.85      | 61         | 124        |

|                    |       |        |      |       |       |      |       |     |     |
|--------------------|-------|--------|------|-------|-------|------|-------|-----|-----|
| 3.00               | 0.063 | 0.398  | 2.08 | 0.148 | 2.210 | 0.85 | -0.85 | 61  | 122 |
| 2.75               | 0.076 | 0.430  | 2.03 | 0.159 | 2.515 | 0.85 | -0.85 | 60  | 121 |
| 2.50               | 0.095 | 0.520  | 1.99 | 0.168 | 2.763 | 0.86 | -0.86 | 59  | 119 |
| 2.25               | 0.121 | 0.693  | 1.96 | 0.173 | 2.948 | 0.86 | -0.86 | 58  | 118 |
| 2.00               | 0.162 | 0.979  | 1.94 | 0.175 | 3.052 | 0.86 | -0.86 | 58  | 118 |
| 1.75               | 0.228 | 1.335  | 1.94 | 0.173 | 3.086 | 0.87 | -0.87 | 58  | 118 |
| 1.65               | 0.267 | 1.421  | 1.94 | 0.171 | 3.087 | 0.87 | -0.87 | 58  | 118 |
| 1.60               | 0.290 | 1.422  | 1.94 | 0.170 | 3.082 | 0.87 | -0.87 | 59  | 118 |
| 1.55               | 0.317 | 1.379  | 1.95 | 0.169 | 3.081 | 0.87 | -0.87 | 59  | 118 |
| 1.50               | 0.347 | 1.278  | 1.95 | 0.167 | 3.075 | 0.87 | -0.87 | 59  | 118 |
| 1.45               | 0.381 | 1.099  | 1.95 | 0.166 | 3.075 | 0.87 | -0.87 | 59  | 118 |
| 1.40               | 0.420 | 0.822  | 1.96 | 0.164 | 3.072 | 0.87 | -0.87 | 59  | 118 |
| 1.35               | 0.463 | 0.423  | 1.96 | 0.163 | 3.074 | 0.87 | -0.87 | 59  | 118 |
| 1.30               | 0.513 | -0.124 | 1.96 | 0.159 | 3.051 | 0.87 | -0.87 | 59  | 118 |
| <b>Na-H...H-Na</b> |       |        |      |       |       |      |       |     |     |
| 3.50               | 0.011 | 0.077  | 1.91 | 0.207 | 3.075 | 0.71 | -0.71 | 71  | 121 |
| 3.25               | 0.016 | 0.115  | 1.91 | 0.206 | 3.062 | 0.70 | -0.70 | 72  | 122 |
| 3.15               | 0.018 | 0.134  | 1.92 | 0.206 | 3.055 | 0.70 | -0.70 | 72  | 122 |
| 3.00               | 0.022 | 0.168  | 1.92 | 0.206 | 3.043 | 0.69 | -0.69 | 73  | 123 |
| 2.75               | 0.033 | 0.239  | 1.92 | 0.204 | 3.016 | 0.68 | -0.68 | 74  | 122 |
| 2.50               | 0.048 | 0.331  | 1.92 | 0.203 | 2.975 | 0.67 | -0.67 | 75  | 121 |
| 2.25               | 0.072 | 0.459  | 1.93 | 0.199 | 2.910 | 0.65 | -0.65 | 76  | 119 |
| 2.00               | 0.109 | 0.654  | 1.94 | 0.194 | 2.799 | 0.62 | -0.62 | 78  | 115 |
| 1.75               | 0.174 | 0.889  | 1.97 | 0.184 | 2.596 | 0.57 | -0.57 | 82  | 110 |
| 1.65               | 0.213 | 0.924  | 1.98 | 0.178 | 2.471 | 0.55 | -0.55 | 83  | 106 |
| 1.60               | 0.237 | 0.899  | 1.99 | 0.175 | 2.395 | 0.54 | -0.54 | 84  | 105 |
| 1.55               | 0.264 | 0.831  | 2.00 | 0.170 | 2.309 | 0.52 | -0.52 | 85  | 103 |
| 1.50               | 0.295 | 0.702  | 2.02 | 0.165 | 2.209 | 0.50 | -0.50 | 87  | 102 |
| 1.45               | 0.331 | 0.493  | 2.03 | 0.160 | 2.097 | 0.48 | -0.48 | 89  | 100 |
| 1.40               | 0.372 | 0.180  | 2.05 | 0.153 | 1.967 | 0.46 | -0.46 | 90  | 97  |
| 1.35               | 0.418 | -0.264 | 2.07 | 0.146 | 1.820 | 0.43 | -0.43 | 92  | 96  |
| 1.30               | 0.471 | -0.870 | 2.10 | 0.137 | 1.651 | 0.41 | -0.41 | 96  | 93  |
| 1.25               | 0.532 | -1.672 | 2.13 | 0.126 | 1.458 | 0.37 | -0.37 | 99  | 90  |
| 1.20               | 0.601 | -2.706 | 2.18 | 0.112 | 1.236 | 0.33 | -0.33 | 105 | 87  |
| 1.15               | 0.682 | -4.017 | 2.25 | 0.096 | 0.979 | 0.29 | -0.29 | 112 | 84  |
| 1.10               | 0.776 | -5.677 | 2.37 | 0.074 | 0.664 | 0.22 | -0.22 | 122 | 79  |
| 1.05               | 0.914 | -5.706 | 6.54 | 0.000 | 0.000 | 0.00 | 0.00  | 147 | 52  |

The optimised structures of the rhombic dimers **2** are presented in *italics*. The topological values of the electron density for RCPs are presented in red.



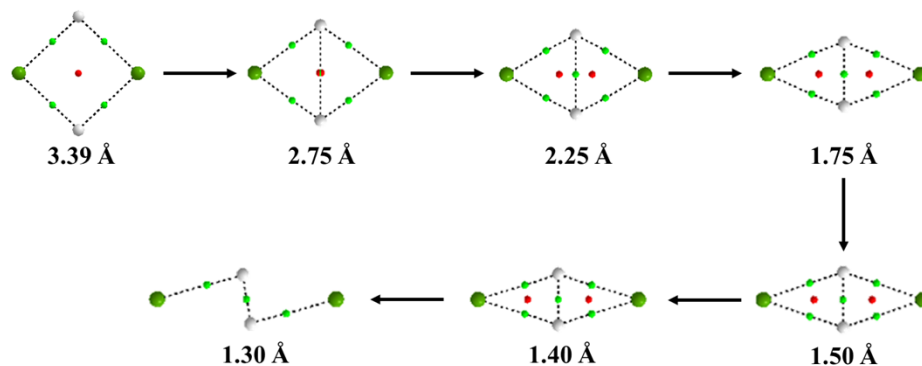

**Figure S10.** Plot of molecular graphs for **3** at a range of H $\cdots$ H separations, with bond (BCP) and ring (RCP) critical points denoted as green and red spheres, respectively.

**Table S4.** Salient topological and atomic properties of the electron density for the M-H and H $\cdots$ H bonds in the rhombic and head-to-tail dimers of **3** at the CCSD/6-311++G(d,p) level of approximation.

| H $\cdots$ H                     |                           |                                   | M-H    |                           |                                   | q(M)<br>au | q(H)<br>au | V(M)<br>au | V(H)<br>au |
|----------------------------------|---------------------------|-----------------------------------|--------|---------------------------|-----------------------------------|------------|------------|------------|------------|
| d<br>Å                           | $\rho_b(r)$<br>eÅ $^{-3}$ | $\nabla^2\rho_b(r)$<br>eÅ $^{-5}$ | d<br>Å | $\rho_b(r)$<br>eÅ $^{-3}$ | $\nabla^2\rho_b(r)$<br>eÅ $^{-5}$ |            |            |            |            |
| <b>3</b>                         |                           |                                   |        |                           |                                   |            |            |            |            |
| 3.50                             | 0.039                     | 0.359                             | 2.49   | 0.127                     | 1.232                             | 0.82       | -0.82      | 135        | 123        |
| 3.39                             | 0.041                     | 0.355                             | 2.46   | 0.132                     | 1.306                             | 0.82       | -0.82      | 134        | 123        |
| 3.25                             | 0.044                     | 0.353                             | 2.43   | 0.137                     | 1.390                             | 0.82       | -0.82      | 134        | 122        |
| 3.00                             | 0.051                     | 0.380                             | 2.38   | 0.147                     | 1.541                             | 0.83       | -0.83      | 133        | 119        |
| 2.75                             | 0.063                     | 0.443                             | 2.34   | 0.156                     | 1.676                             | 0.83       | -0.83      | 132        | 118        |
| 2.50                             | 0.083                     | 0.554                             | 2.31   | 0.163                     | 1.788                             | 0.83       | -0.83      | 132        | 117        |
| 2.25                             | 0.110                     | 0.730                             | 2.29   | 0.168                     | 1.875                             | 0.83       | -0.83      | 131        | 116        |
| 2.00                             | 0.151                     | 1.002                             | 2.27   | 0.170                     | 1.937                             | 0.83       | -0.83      | 131        | 115        |
| 1.75                             | 0.219                     | 1.315                             | 2.27   | 0.169                     | 1.978                             | 0.83       | -0.83      | 131        | 115        |
| 1.65                             | 0.260                     | 1.364                             | 2.27   | 0.168                     | 1.990                             | 0.84       | -0.84      | 131        | 115        |
| 1.60                             | 0.284                     | 1.341                             | 2.27   | 0.166                     | 1.994                             | 0.84       | -0.84      | 131        | 114        |
| 1.55                             | 0.311                     | 1.268                             | 2.28   | 0.164                     | 1.995                             | 0.84       | -0.84      | 132        | 114        |
| 1.50                             | 0.343                     | 1.133                             | 2.28   | 0.163                     | 2.007                             | 0.84       | -0.84      | 132        | 114        |
| 1.45                             | 0.378                     | 0.911                             | 2.29   | 0.160                     | 2.010                             | 0.84       | -0.84      | 132        | 114        |
| 1.40                             | 0.418                     | 0.581                             | 2.29   | 0.158                     | 2.013                             | 0.83       | -0.83      | 132        | 113        |
| 1.35                             | 0.464                     | 0.115                             | 2.29   | 0.151                     | 2.002                             | 0.83       | -0.83      | 132        | 113        |
| 1.30                             | 0.520                     | -0.93                             | 2.33   | 0.146                     | 1.738                             | 0.59       | -0.59      | 141        | 97         |
| <b>K-H<math>\cdots</math>H-K</b> |                           |                                   |        |                           |                                   |            |            |            |            |
| 3.50                             | 0.013                     | 0.085                             | 2.26   | 0.192                     | 1.857                             | 0.69       | -0.69      | 143        | 118        |
| 3.39                             | 0.015                     | 0.102                             | 2.26   | 0.191                     | 1.851                             | 0.68       | -0.68      | 143        | 119        |
| 3.25                             | 0.018                     | 0.124                             | 2.26   | 0.191                     | 1.843                             | 0.68       | -0.68      | 143        | 119        |
| 3.00                             | 0.026                     | 0.177                             | 2.27   | 0.189                     | 1.825                             | 0.67       | -0.67      | 144        | 119        |
| 2.75                             | 0.037                     | 0.245                             | 2.27   | 0.187                     | 1.799                             | 0.65       | -0.65      | 145        | 119        |
| 2.50                             | 0.053                     | 0.328                             | 2.28   | 0.184                     | 1.764                             | 0.63       | -0.63      | 148        | 117        |
| 2.25                             | 0.078                     | 0.441                             | 2.29   | 0.179                     | 1.710                             | 0.60       | -0.60      | 149        | 114        |
| 2.00                             | 0.118                     | 0.611                             | 2.31   | 0.172                     | 1.628                             | 0.57       | -0.57      | 150        | 110        |

|      |       |        |      |       |       |      |       |     |     |
|------|-------|--------|------|-------|-------|------|-------|-----|-----|
| 1.75 | 0.185 | 0.802  | 2.35 | 0.160 | 1.490 | 0.51 | -0.51 | 152 | 103 |
| 1.65 | 0.226 | 0.804  | 2.37 | 0.153 | 1.409 | 0.48 | -0.48 | 153 | 100 |
| 1.60 | 0.251 | 0.758  | 2.38 | 0.149 | 1.360 | 0.47 | -0.47 | 154 | 98  |
| 1.55 | 0.279 | 0.665  | 2.39 | 0.145 | 1.305 | 0.45 | -0.45 | 154 | 97  |
| 1.50 | 0.311 | 0.505  | 2.41 | 0.139 | 1.241 | 0.43 | -0.43 | 155 | 95  |
| 1.45 | 0.348 | 0.258  | 2.43 | 0.133 | 1.168 | 0.41 | -0.41 | 157 | 93  |
| 1.40 | 0.389 | -0.101 | 2.46 | 0.126 | 1.083 | 0.39 | -0.39 | 160 | 91  |
| 1.35 | 0.437 | -0.604 | 2.49 | 0.117 | 0.986 | 0.36 | -0.36 | 162 | 89  |
| 1.30 | 0.492 | -1.285 | 2.53 | 0.106 | 0.873 | 0.33 | -0.33 | 163 | 87  |
| 1.25 | 0.555 | -2.180 | 2.59 | 0.093 | 0.743 | 0.29 | -0.29 | 166 | 83  |
| 1.20 | 0.627 | -3.328 | 2.68 | 0.077 | 0.592 | 0.24 | -0.24 | 171 | 80  |
| 1.15 | 0.711 | -4.762 | 2.81 | 0.057 | 0.417 | 0.19 | -0.19 | 175 | 76  |
| 1.10 | 0.826 | -6.997 | 6.00 | 0.001 | 0.005 | 0.01 | -0.01 | 180 | 54  |

The optimised structures of the rhombic dimers **3** are presented in *italics*. The topological values of the electron density for RCPs are present in red.

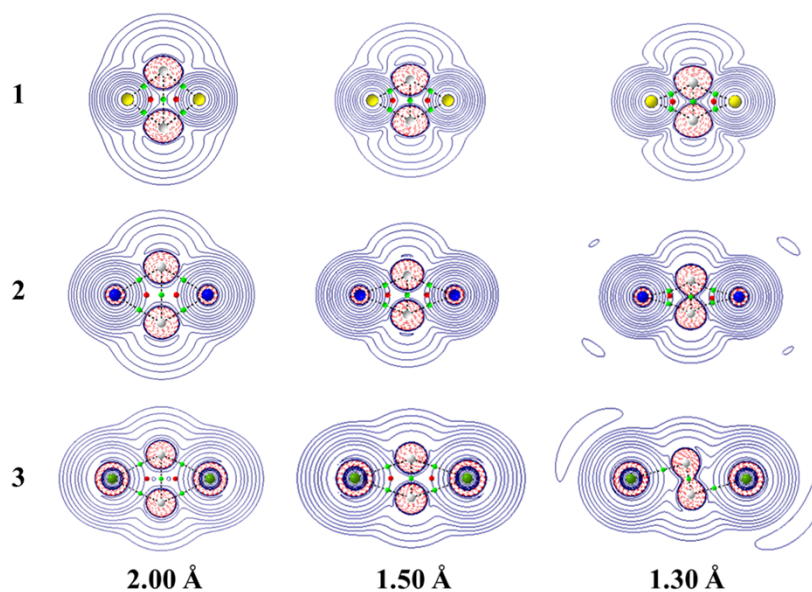

**Figure S11.**  $\nabla^2\rho_b(\mathbf{r})$  plots of the rhombic dimers of **1-3** at a range of H $\cdots$ H separations. The positive (solid blue) and negative (dashed red) contours are plotted in increments of  $2.4 \times 10^{-2}$ ,  $4.8 \times 10^n$ ,  $9.6 \times 10^n$ , and  $1.9 \times 10^{n+1}$  ( $n = -2, -1, 0, 1, 2,$  and  $3$ ).

**Table S5.** Salient angles for the rhombic dimers of **1-3** at the CCSD/6-311++G(d,p) level of approximation.

| d<br>Å | 1          |            | 2          |            | 3          |            |
|--------|------------|------------|------------|------------|------------|------------|
|        | H-M-H<br>° | M-H-M<br>° | H-M-H<br>° | M-H-M<br>° | H-M-H<br>° | M-H-M<br>° |
| 3.50   | 115        | 65         | 104        | 76         | 90         | 91         |
| 3.39   | -          | -          | -          | -          | 87         | 93         |
| 3.25   | 111        | 56         | 98         | 82         | 84         | 96         |
| 3.15   | -          | -          | 96         | 84         | -          | -          |
| 3.00   | 107        | 53         | 92         | 88         | 78         | 102        |

|      |            |           |    |     |    |     |
|------|------------|-----------|----|-----|----|-----|
| 2.75 | 101        | 51        | 85 | 95  | 72 | 108 |
| 2.68 | <i>100</i> | <i>81</i> | -  | -   | -  | -   |
| 2.50 | 94         | 86        | 78 | 102 | 66 | 115 |
| 2.25 | 86         | 94        | 70 | 110 | 59 | 121 |
| 2.00 | 77         | 103       | 62 | 118 | 52 | 128 |
| 1.75 | 67         | 113       | 54 | 126 | 45 | 135 |
| 1.65 | 63         | 117       | 50 | 130 | 43 | 137 |
| 1.60 | 61         | 119       | 49 | 131 | 41 | 139 |
| 1.55 | 59         | 121       | 47 | 133 | 40 | 140 |
| 1.50 | 57         | 123       | 45 | 135 | 38 | 142 |
| 1.45 | 55         | 125       | 44 | 136 | 37 | 143 |
| 1.40 | 53         | 127       | 42 | 138 | 36 | 145 |
| 1.35 | 51         | 129       | 40 | 140 | 33 | 147 |
| 1.30 | 49         | 131       | 39 | 142 | 31 | 149 |
| 1.25 | 47         | 133       | -  | -   | -  | -   |
| 1.20 | 45         | 135       | -  | -   | -  | -   |
| 1.15 | 42         | 138       | -  | -   | -  | -   |
| 1.10 | 40         | 140       | -  | -   | -  | -   |
| 1.05 | 38         | 142       | -  | -   | -  | -   |
| 1.00 | 36         | 144       | -  | -   | -  | -   |

---
